# Supplementary material for: Novel Potential Diagnostic Serum Biomarkers of Metabolomics in Osteoarticular Tuberculosis Patients: A Preliminary Study
Source: PubMed Central journal article supplement (PMC8992656; doi:10.3389/fcimb.2022.827528), 2022-03-25
Supplement: DataSheet_1.pdf [file DataSheet_1.pdf]

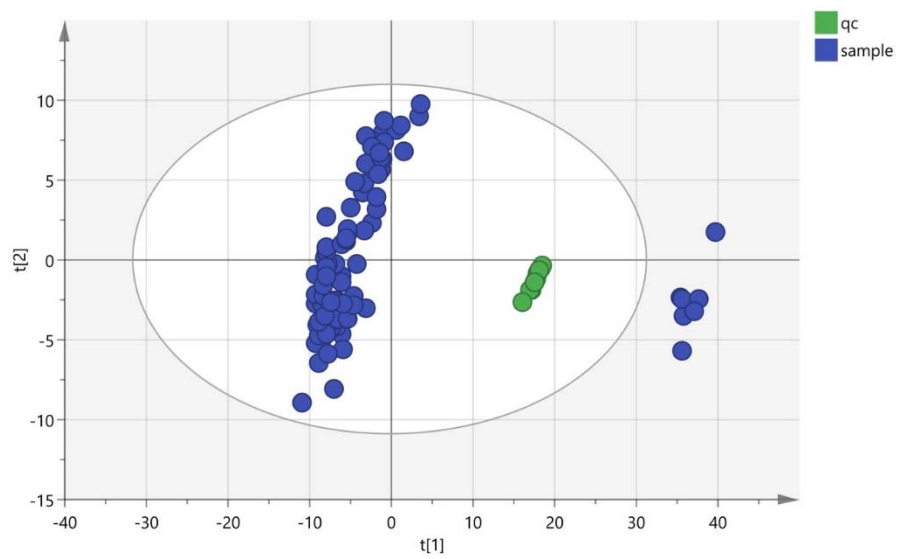

Figure 1 QC result of reversed-phase chromatography positive ion pattern

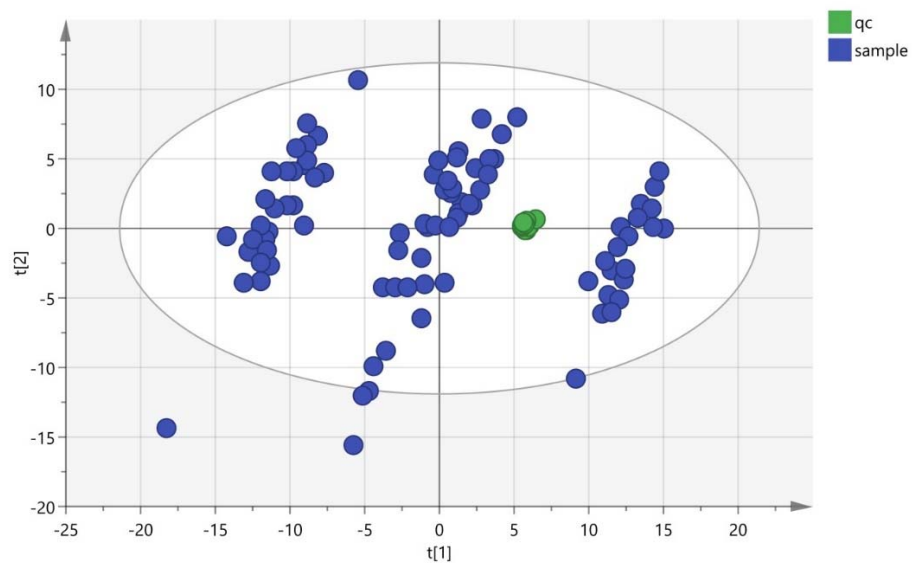

Figure 2 QC result of reversed-phase chromatography anion pattern

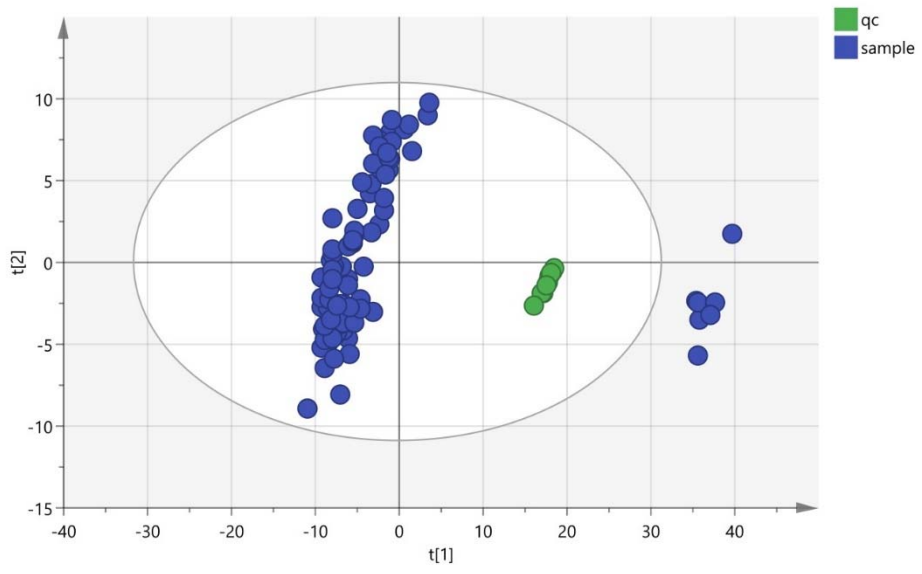

Figure 3 QC result of hydrophilic chromatography positive ion pattern
